# Supplementary material for: A primary human macrophage-enteroid co-culture model to investigate mucosal gut physiology and host-pathogen interactions
Source: PubMed Central journal article supplement (PMC5366908; doi:10.1038/srep45270), 2017-03-27
Supplement: srep45270-s1.pdf [file srep45270-s1.pdf]

A primary human macrophage-enteroid co-culture model to investigate  
mucosal gut physiology and host-pathogen interactions

Gaelle Noel, Nicholas W. Baetz, Janet F. Staab, Mark Donowitz, Olga  
Kovbasnjuk, Marcela F. Pasetti, Nicholas C. Zachos

**SUPPLEMENTARY INFORMATION**

|                                | DF            |               | DF + M $\phi$ |                 | M $\phi$        |
|--------------------------------|---------------|---------------|---------------|-----------------|-----------------|
|                                | Apical        | Basolateral   | Apical        | Basolateral     |                 |
| <b>TNF-<math>\alpha</math></b> | 0.0 $\pm$ 0.0 | 0.1 $\pm$ 0.0 | 0.0 $\pm$ 0.0 | 0.3 $\pm$ 0.0   | 0.5 $\pm$ 0.1   |
| <b>IL-1<math>\beta</math></b>  | 0.1 $\pm$ 0.0 | 0.1 $\pm$ 0.1 | 0.1 $\pm$ 0.0 | 1.3 $\pm$ 0.3   | 3.0 $\pm$ 0.5   |
| <b>IL-2</b>                    | 0.1 $\pm$ 0.0 | 0.4 $\pm$ 0.1 | 0.1 $\pm$ 0.0 | 10.6 $\pm$ 4.0  | 15.0 $\pm$ 1.8  |
| <b>IL-4</b>                    | 0.0 $\pm$ 0.0 | 0.0 $\pm$ 0.0 | 0.0 $\pm$ 0.0 | 61.4 $\pm$ 30.2 | 48.1 $\pm$ 19.7 |
| <b>IL-10</b>                   | 0.0 $\pm$ 0.0 | 0.0 $\pm$ 0.0 | 0.0 $\pm$ 0.0 | 0.8 $\pm$ 0.3   | 1.7 $\pm$ 0.3   |
| <b>IL-12p70</b>                | 0.0 $\pm$ 0.0 | 0.0 $\pm$ 0.0 | 0.0 $\pm$ 0.0 | 0.1 $\pm$ 0.0   | 0.2 $\pm$ 0.1   |
| <b>IL-13</b>                   | 0.1 $\pm$ 0.1 | 0.0 $\pm$ 0.0 | 0.2 $\pm$ 0.1 | 6.8 $\pm$ 2.3   | 15.6 $\pm$ 4.4  |

**Supplementary Table S1: Human macrophage-enteroids discretely secrete additional cytokines *ex vivo*.**

Total amount of IL-1 $\beta$ , IL-2, IL-4, IL-10, IL-12p70, IL-13, and TNF- $\alpha$  released in the apical and basolateral media of DF enteroid monolayer in absence or presence of macrophages (M $\phi$ ), and by M $\phi$  alone following 24h of culture. Values are presented as Mean  $\pm$  SEM of 3 independent experiments involving 3 different small intestinal enteroid lines.
